# Supplementary material
Source: MDPI journal article supplement (https://www.mdpi.com/2076-3263/11/11/479)
Supplement: s1 [file s1]

Archive with 3 entries (3 files):
- Supplementary Table S1.xlsx
- Supplementary Table S2.xlsx
- Supplementary Text S1.pdf
