# Supplementary material
Source: MDPI journal article supplement (https://www.mdpi.com/2076-3263/11/11/479)
Supplement: s1 [file s1 › Supplementary Table S1.xlsx]

## Sheet: Hoja1
Caravaca Tie Points	Height	GTS2020	kyr after KPB	Stratigraphical interval	Sedimentation rate
	cm from KPB	Ma			cm/kyr
Cretaceous/Paleogene boundary (KPB)	0	66.001	0
KPB dark clay bed top	6	65.991	10	KPB dark clay bed	0.60
C29r/C29n reversal	510	65.7	301	C29r (Danian part)	1.67
C29n/C28r reversal	980	64.862	1139	C29n	0.41
C28r/C28n reversal	1230	64.645	1356	C28r	0.18
C28n/C27r reversal	2030	63.537	2464	C28n	0.30
Caravaca Key-biohorizons	Height	GTS2020	kyr after KPB
	cm from KPB	Ma
KPB mass extinction horizon (Dan1 base)	0	66.001	0
LOD G. acme (DanAZ-1 base)	0	66.001	0
LOD Pv. longiapertura (Dan2 base)	3	65.996	5
LOD Pv-Pg acme (DanAZ-2 base)	5	65.993	8
LOD Pv. eugubina (Dan3a base)	22	65.982	19
LOD E. simplicissima (Dan3b base)	42	65.97	31
LOD W-Ch acme (DanAZ-3 base)	55	65.963	38
LOD P. pseudobulloides (Dan4a base)	107	65.933	68
LOD S. triloculinoides (Dan4b base)	332	65.803	198
lower/upper DanAZ-3	430	65.746	255
LOD G. compressa (Dan4c base)	655	65.441	560
LOD E-S-P-Gl-Pr dominance (DanAZ-3 top)	?	?	?
LOD A. trinidadensis (Dan4c top)	1700	63.888	2113
