# Supplementary material
Source: MDPI journal article supplement (https://www.mdpi.com/2076-3263/11/11/479)
Supplement: s1 [file s1 › Supplementary Table S2.xlsx]

## Sheet: Hoja1
Zumaia Tie points	Height	GTS2020/La2011	kyr after KPB	Stratigraphical interval	Precession cycles count	Height	Sedimentation rate	Age
	cm from KPB	Ma				cm from KPB	cm/kyr	Ma
Cretaceous/Paleogene boundary (KPB)	0	66.001	0		405-kyr max. Pc4052 P. cycle (29)	865	1.31579	65.353
KPB dark clay bed top	9	65.991	10	KPB–KPB dark clay bed top	P. cycle (28)	835	1.11607	65.3758
405-kyr min	50	65.967	34	KPB dark clay bed–405-k.y. min.	P. cycle (21)	810	2.00893	65.3982
405-kyr max. Pc4051	365	65.76	241	405-kyr min–405-kyr max. Pc4051	P. cycle (26)	765	1.11607	65.4206
405-kyr min	615	65.555	446	405-kyr max. Pc4051–405-kyr min	P. cycle (25)	740	0.669643	65.443
405-kyr max. Pc4052	865	65.353	648	405-kyr min–405-kyr max. Pc4052	P. cycle (24)	725	1.11607	65.4654
					P. cycle (23)	700	0.669643	65.4878
Zumaia Key-biohorizons	Height	GTS2020	kyr after KPB	Cyclostratigraphic position for the biohorizon base	P. cycle (22)	685	1.78571	65.5102
	cm from KPB	Ma			P. cycle (21)	645	1.33929	65.5326
KPB mass extinction horizon (Dan1 base)	0	66.001	0	KPB	405- kyr min. P. cycle (20)	615	1.06838	65.555
LOD G. acme (DanAZ-1 base)	0	66.001	0	KPB	P. cycle (19)	590	1.54185	65.5784
LOD Pv. longiapertura (Dan2 base)	6	65.994	7	KPB dark clay bed (0.5 P. cycle)	P. cycle (18)	555	1.54185	65.6011
LOD Pv-Pg acme (DanAZ-2 base)	6	65.994	7	KPB dark clay bed (0.5 P. cycle)	P. cycle (17)	520	1.10132	65.6238
LOD Pv. eugubina (Dan3a base)	23	65.983	18	Within P. cycle (1)	P. cycle (16)	495	1.32159	65.6465
LOD E. simplicissima (Dan3b base)	37	65.975	26	Within P. cycle (1)	P. cycle (15)	465	1.32159	65.6692
LOD W-Ch acme (DanAZ-3 base)	55	65.959	42	Within P. cycle( 2)	P. cycle (14)	435	1.32159	65.6919
LOD P. pseudobulloides (Dan4a base)	100	65.933	68	Within P. cycle (3)	P. cycle (13)	405	1.10132	65.7146
LOD S. triloculinoides (Dan4b base)	330	65.791	210	Within P. cycle (10)	P. cycle (12)	380	0.660793	65.7373
lower/upper DanAZ-3	365	65.76	241	Within P. cycle (11)	405-kyr max. Pc4051 P. cycle (11)	365	0.966184	65.76
LOD G. compressa (Dan4c base)	655	65.528	473		P. cycle (10)	345	1.44928	65.7807
					P. cycle ( 9)	315	0.966184	65.8014
					P. cycle( 8)	295	1.20773	65.8221
					P. cycle (7)	270	1.20773	65.8428
					P. cycle (6)	245	1.69082	65.8635
					P. cycle (5)	210	2.17391	65.8842
					P. cycle (4)	165	2.41546	65.9049
					P. cycle (3)	115	2.17391	65.9256
					P. cycle( 2)	70	0.966184	65.9463
					405-kyr min. P. cycle (1)	50	1.70833	65.967
					KPB dark clay bed P. cycle (0.5)	9	0.9	65.991
					KPB	0	–	66.001
